# Supplementary material for: Analysis and Reconstitution of the Menaquinone Biosynthesis Pathway in Lactiplantibacillus plantarum and Lentilactibacillus buchneri
Source: MDPI journal article supplement (doi:10.3390/microorganisms9071476), 2021-07-09
Supplement: s1 [file s1]

## Supplementary Material

**Table S1.** The Cre-*lox* system plasmids and knockout plasmid constructs

| Plasmids              | Relevant features                                                                                                                   | References             |
|-----------------------|-------------------------------------------------------------------------------------------------------------------------------------|------------------------|
| pNZ5319               | Cm <sup>r</sup> , Ery <sup>r</sup> , containing <i>lox66</i> -P32- <i>cm-lox71</i> fragment                                         | (Lambert et al., 2007) |
| pNZ5348               | Ery <sup>r</sup> , Cre-recombinase expression                                                                                       | (Lambert et al., 2007) |
| pNZ5319- <i>ΔmenA</i> | Cm <sup>r</sup> , Ery <sup>r</sup> ; pNZ5319 derivative containing homologous regions upstream and downstream of NZ9000 <i>menA</i> | This study             |
| pNZ5319- <i>ΔmenB</i> | Cm <sup>r</sup> , Ery <sup>r</sup> ; pNZ5319 derivative containing homologous regions upstream and downstream of NZ9000 <i>menB</i> | This study             |
| pNZ5319- <i>ΔmenE</i> | Cm <sup>r</sup> , Ery <sup>r</sup> ; pNZ5319 derivative containing homologous regions upstream and downstream of NZ9000 <i>menE</i> | This study             |
| pNZ5319- <i>ΔmenG</i> | Cm <sup>r</sup> , Ery <sup>r</sup> ; pNZ5319 derivative containing homologous regions upstream and downstream of NZ9000 <i>menG</i> | This study             |

**Table S2.** Sequence of oligonucleotide primers

| Primer                 | Nucleotides                           |
|------------------------|---------------------------------------|
| up A F <i>Xho</i> I    | CGTCTCGAGATTGTTCTTAATGGCTCAAAA        |
| up A R <i>Swa</i> I    | TGCATTTAAATTTCTCTTTTAATGTGATTTATCAA   |
| down A F <i>Sac</i> I  | TCCGAGCTCATAAAAACTCCAATTAATTAA        |
| down A R <i>Bgl</i> II | CGAAGATCTTTTTATTTAAAGCTTATAACTG       |
| up B F <i>Xho</i> I    | GATCTCGAGTCGGCTCCCCTTGAAAAA           |
| up B R <i>Swa</i> I    | GAAATTTAAATGATTTCCTTTAAGATGTGAGGG     |
| down B F <i>Ban</i> II | TCCGRGCYCATAAAGCGTCATTTTGGCGC         |
| down B R <i>Bgl</i> II | CGAAGATCTATGTTTATTTTCCAGAATTGACCACTTC |
| up E F <i>Xho</i> I    | CCGCTCGAGACTGGGTTGCCCTTA              |
| up E R <i>Swa</i> I    | CGCATCATTTAAATAGCGCCAAAATGACG         |
| down E F <i>Ban</i> II | TCCGAGCTCAAGGGCCTTCCGGAT              |
| down E R <i>Bgl</i> II | CGAAGATCTACCGGCCATAGCATTTC            |
| up G F <i>Xho</i> I    | GATCTCGAGCCTGACGTCGAGTCTG             |
| up G R <i>Swa</i> I    | GTCATTTAAATACTGGTCACAAGGTCAGC         |
| down G F <i>Sac</i> I  | GCCGAGCTCAGTTTTGAACGCTTGGATAG         |
| down G R <i>Bam</i> HI | TACGGATCCTCGAGCACGCTTCTTTTAT          |
| lox F                  | AAATCTACCGTTCGTATAATGTATGC            |
| lox R                  | CTCATGCCCCGGGCTGTACCG                 |
| menA F                 | GTTTCTGCTGGGCCTTTCGTAC                |

|         |                          |
|---------|--------------------------|
| men A R | GACAATGGTTTTGGGCCTCCTG   |
| men B F | TCGCAATGCTTTTCGTCCAA     |
| men B R | TCCCGCAAATTGTTGCAGTC     |
| men E F | ATGAAATGGTTAAAAAACAGGCGG |
| men E R | TCATGCTTTGAGCTCTTT       |
| men G F | AACGAAGAACGTGTGCAAGA     |
| men G R | AAGCGTCTTGGCATCTGGAA     |
| Ery F   | CGATACCGTTTACGAAAT       |
| Ery R   | CTTGCTCATAAGTAACGG       |

---

\*Underlined sequences indicate the restriction sites.

**Table S3.** Primers used for the functional verification of menaquinone biosynthesis genes study

| Primers | Nucleotides                          |
|---------|--------------------------------------|
| LpA1 F  | GGAGTACTTTGAAACCAAAAGTGTTCCTTGAA     |
| LpA1 R  | CTAGAGCTCCTAGTTAAAAATCAGTCCTAAGCC    |
| LpA2 F  | GGAGTACTTTGTTGACGAACGAACCAAC         |
| LpA2 R  | CTAGAGCTCTTAAAAGAAAATACCCAGGATCAGTC  |
| LpA3 F  | GGAGTACTATGTTTAAAAAATGGCTAACTTG      |
| LpA3 R  | CTAGAGCTCTTACAACCAAGTCCCTAAAACAAA    |
| LpG1 F  | GGAGTACTATGACAGCTTTAGAAAGAAGTTG      |
| LpG1 R  | TACGAGCTCTCAATCACGACGAGCCA           |
| LpG2 F  | GGAGTACTATGGCAAATCGTTATTTAC          |
| LpG2 R  | CTAGAGCTCTTACTTGGCCTCCTTAG           |
| LbA F   | GGAGTACTATGAGTTTATCAACTTTTCCCAG      |
| LbA R   | CTAGAGCTCCTAGTGGGCAATCAGGG           |
| LbG F   | GGAGTACTATGACGCTGACGAACAA            |
| LbG R   | CTAGAGCTCTCAGGGCTTCATTCCCCA          |
| LbB F   | GGAGTACTATGACTTCAGTTAAATGGGAATC      |
| LbB R   | CTAGAGCTCCTATGGGAACTTAGGAAATTG       |
| LbE F   | GGAGTACTATGAAAGTGGATAATTGGATTTTAA    |
| LbE R   | CTAGAGCTCTTATAACAACGTGTTTCAGCTTGAATC |
| LLA F   | GGAGTACTATGAATTTTAAAACATTTCGCT       |

|           |                                       |
|-----------|---------------------------------------|
| LLA R     | GGCGAGCTCTTAAAATCTAATCAAACATAATAAAGA  |
| LLB F     | GGAGTACTATGTCAAAATTTAACTGGGTTC        |
| LLB R     | GGCGAGCTCTTATGGGAATTTGGAAATTGGTC      |
| LLE F     | GGAGTACTATGAAATGGTTAAAAAACAGGCG       |
| LLE R     | AACGGYRCCTCATGCTTTGAGCTCTTTCTTAA      |
| LLG F     | GGAGTACTATGACTAAAGTAAACGAAGAACGT      |
| LLG R     | GGCGAGCTCTTACTTTTTACCAATACGAATATTGATT |
| pnz8150 F | GCATAATAAACGGCTCTGAT                  |
| pnz8150 R | CAGCAATATCAGTAATTGCTTTATC             |

---

\*Underlined sequences indicate the restriction sites.

**Table S4.** Plasmids and menaquinone expression plasmid constructs

| Plasmids                | Relevant features                                                      | References                     |
|-------------------------|------------------------------------------------------------------------|--------------------------------|
| pNZ8150                 | Cm <sup>r</sup> ; nisA promoter, expression vector                     | (Mierau and Kleerebezem, 2005) |
| pNZ8150- <i>lpmenA1</i> | Cm <sup>r</sup> ; nisA promoter, <i>lpmenA1</i> gene cloned to the MCS | This study                     |
| pNZ8150- <i>lpmenA2</i> | Cm <sup>r</sup> ; nisA promoter, <i>lpmenA2</i> gene cloned to the MCS | This study                     |
| pNZ8150- <i>lpmenA3</i> | Cm <sup>r</sup> ; nisA promoter, <i>lpmenA3</i> gene cloned to the MCS | This study                     |
| pNZ8150- <i>lpmenG1</i> | Cm <sup>r</sup> ; nisA promoter, <i>lpmenG1</i> gene cloned to the MCS | This study                     |
| pNZ8150- <i>lpmenG2</i> | Cm <sup>r</sup> ; nisA promoter, <i>lpmenG2</i> gene cloned to the MCS | This study                     |
| pNZ8150- <i>lbmenA</i>  | Cm <sup>r</sup> ; nisA promoter, <i>lbmenA</i> gene cloned to the MCS  | This study                     |
| pNZ8150- <i>lbmenB</i>  | Cm <sup>r</sup> ; nisA promoter, <i>lbmenB</i> gene cloned to the MCS  | This study                     |
| pNZ8150- <i>lbmenE</i>  | Cm <sup>r</sup> ; nisA promoter, <i>lbmenE</i> gene cloned to the MCS  | This study                     |
| pNZ8150- <i>lbmenG</i>  | Cm <sup>r</sup> ; nisA promoter, <i>lbmenG</i> gene cloned to the MCS  | This study                     |
| pNZ8150- <i>llmenA</i>  | Cm <sup>r</sup> ; nisA promoter, <i>llmenA</i> gene cloned to the MCS  | This study                     |
| pNZ8150- <i>llmenB</i>  | Cm <sup>r</sup> ; nisA promoter, <i>llmenB</i> gene cloned to the MCS  | This study                     |
| pNZ8150- <i>llmenE</i>  | Cm <sup>r</sup> ; nisA promoter, <i>llmenE</i> gene cloned to the MCS  | This study                     |
| pNZ8150- <i>llmenG</i>  | Cm <sup>r</sup> ; nisA promoter, <i>llmenG</i> gene cloned to the MCS  | This study                     |

**Table S5.** *Lactococcus lactis* strains with menaquinone expression plasmid

| Strains                        | Relevant features                                             | References |
|--------------------------------|---------------------------------------------------------------|------------|
| <i>Lactococcus lactis</i> (II) |                                                               |            |
| <i>lpmenA1</i>                 | NZ9000- $\Delta$ <i>menA</i> carrying pNZ8150- <i>lpmenA1</i> | This study |
| <i>lpmenA2</i>                 | NZ9000- $\Delta$ <i>menA</i> carrying pNZ8150- <i>lpmenA2</i> | This study |
| <i>lpmenA3</i>                 | NZ9000- $\Delta$ <i>menA</i> carrying pNZ8150- <i>lpmenA3</i> | This study |
| <i>lpmenG1</i>                 | NZ9000- $\Delta$ <i>menG</i> carrying pNZ8150- <i>lpmenG1</i> | This study |
| <i>lpmenG2</i>                 | NZ9000- $\Delta$ <i>menG</i> carrying pNZ8150- <i>lpmenG2</i> | This study |
| <i>lbmenA</i>                  | NZ9000- $\Delta$ <i>menA</i> carrying pNZ8150- <i>lbmenA</i>  | This study |
| <i>lbmenB</i>                  | NZ9000- $\Delta$ <i>menB</i> carrying pNZ8150- <i>lbmenB</i>  | This study |
| <i>lbmenE</i>                  | NZ9000- $\Delta$ <i>menE</i> carrying pNZ8150- <i>lbmenE</i>  | This study |
| <i>lbmenG</i>                  | NZ9000- $\Delta$ <i>menG</i> carrying pNZ8150- <i>lbmenG</i>  | This study |
| <i>llmenA</i>                  | NZ9000- $\Delta$ <i>menA</i> carrying pNZ8150- <i>llmenA</i>  | This study |
| <i>llmenB</i>                  | NZ9000- $\Delta$ <i>menB</i> carrying pNZ8150- <i>llmenB</i>  | This study |
| <i>llmenE</i>                  | NZ9000- $\Delta$ <i>menE</i> carrying pNZ8150- <i>llmenE</i>  | This study |
| <i>llmenG</i>                  | NZ9000- $\Delta$ <i>menG</i> carrying pNZ8150- <i>llmenG</i>  | This study |

**Table S6.** Primers used for the reconstitution of menaquinone biosynthesis pathway in *Lactipl. plantarum* and *Lent. buchneri* strains

| Primers                                                                                                    | Nucleotides                                                       |
|------------------------------------------------------------------------------------------------------------|-------------------------------------------------------------------|
| Psip 409 BsaIKO F                                                                                          | CACGTTACTAAAGGAAATGGAGACCGGGGT                                    |
| Psip409 BsaIKO R                                                                                           | CGGTCGCCATTCCCTTTAGTAACGTGTAACCTTCCAAAT                           |
| Psip409 F BsaI                                                                                             | AAGGGTCTCATGCGTCTAGACTCGAGGAATT                                   |
| Psip409 R BsaI                                                                                             | CATGGTCTCCGATCGCTAAAATCTCCTTGTAATA                                |
| <b>Golden Gate Assemble for <i>Lactipl. plantarum</i> WCFS1 menaquinone expression vector construction</b> |                                                                   |
| Psip409 backbone F BsaI                                                                                    | AAGGGTCTCATGCGTCTAGACTCGAGGAATT                                   |
| Psip409 backbone R BsaI                                                                                    | CATGGTCTCCCGCCGCTAAAATCTCCTTGTAATA                                |
| GO menF Lp F                                                                                               | TATGGTCTCAGCGGATTACAAGGAGATTTTAGCCATGAAATATATAAAAAACGATTTAATATTAA |
| GO menF Lp R                                                                                               | CGCGGTCTCATCTTTCATAAGGCTTCTAAAA                                   |
| GO menD Lp F                                                                                               | TATGGTCTCAGATATTACAAGGAGATTTTAGCCATGACCAATGAATATTTAGCTCC          |
| GO menD Lp R                                                                                               | CGCGGTCTCCCTGATCAATTTTCATAAGCAGTATATTTTTTAT                       |
| GO menH Lp F                                                                                               | TATGGTCTCATCAGATTACAAGGAGATTTTAGCCATGAAAATTGATAAAAAAATAATGACGA    |
| GO menH Lp R                                                                                               | CGCGGTCTCGTAAGCCTAAGCCAAAAATTCCTC                                 |
| PsspQ LP F                                                                                                 | TATGGTCTCGCTTAGGAGATCTACCGGTTAATTTGAAA                            |
| PsspQ LP R                                                                                                 | CGCGGTCTCGGCTCCGCGGCTAAAATCTCCTTGTAATAGT                          |



---

|              |                                                                                   |
|--------------|-----------------------------------------------------------------------------------|
| GO menB Lp F | TAT <u>GGTCTCG</u> <span>GAGC</span> ATTACAAGGAGATTTTAGCCATGTCAAATTTAACTGGGTTG    |
| GO menB Lp R | CGC <u>GGTCTCG</u> <span>AACC</span> TTATGGGAATTTTGGAAATTGG                       |
| GO menE Lp F | TAT <u>GGTCTCA</u> <span>GGTT</span> ATTACAAGGAGATTTTAGCCATGAAATGGTTAAAAAACAGGC   |
| GO menE Lp R | CGC <u>GGTCTCT</u> <span>GTAGT</span> CATGCTTTGAGCTCTTT                           |
| GO menC LP F | TAT <u>GGTCTCA</u> <span>CTAC</span> ATTACAAGGAGATTTTAGCCATGAAAATTGAAAAATCACAATGT |
| GO menC Lp R | CGC <u>GGTCTCT</u> <span>CGCAT</span> CATTTC AAGGAGGTCAAGC                        |

---

\*Underlined sequences indicate the restriction sites

Ribosome binding site are highlighted in grey

Colored nucleotides represent the overhangs for Golden Gate Assembly and the same color showed the complementary bases

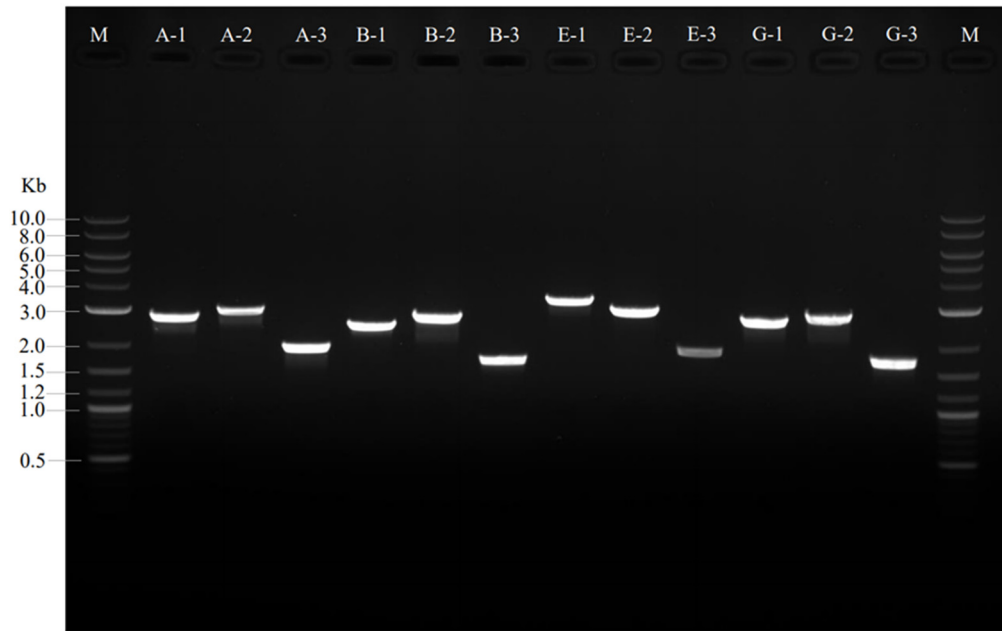

**Figure S1.** Diagnostic PCR of *L. lactis* NZ9000 *menA* (A-1), its gene replacement mutant *menA::lox66-P32-cm-lox71* (A-2),  $\Delta menA$  (A-3); *menB* (B-1), *menB::lox66-P32-cm-lox71* (A-2),  $\Delta menB$  (B-3); *menE* (E-1), *menE::lox66-P32-cm-lox71* (E-2),  $\Delta menE$  (E-3); *menG* (G-1), *menG::lox66-P32-cm-lox71* (A-2),  $\Delta menG$  (G-3); M is a 2 log DNA ladder

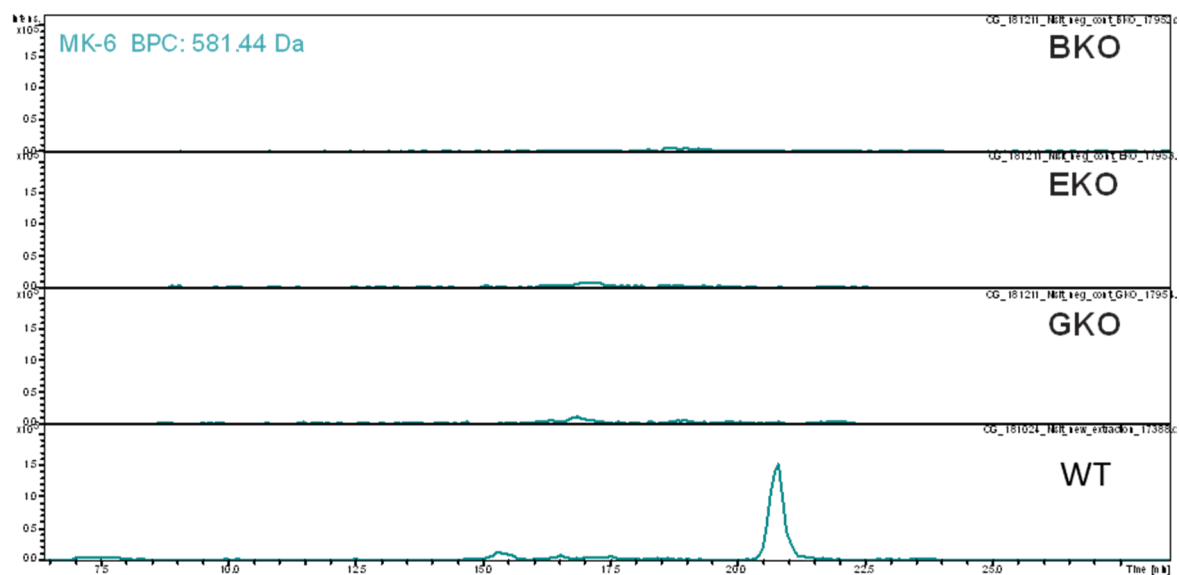

**Figure S2.** Base peak chromatogram of menaquinone extracts from *L. lactis* NZ9000 (WT) and its menaquinone deficient strains  $\Delta menB$  (BKO),  $\Delta menE$  (EKO),  $\Delta menG$  (GKO) for MK-6.

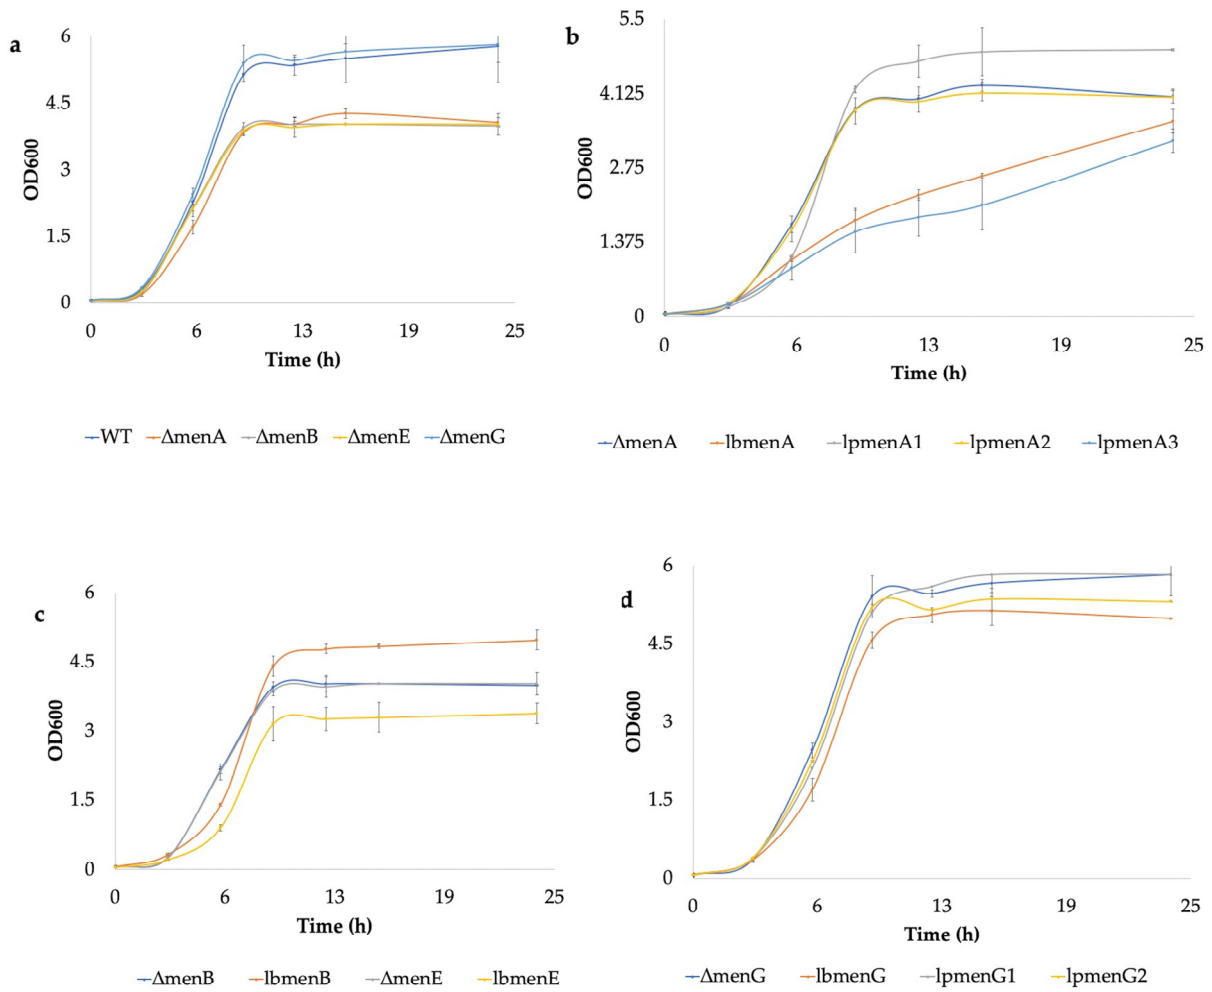

**Figure S3.** Growth profile analysis of (a) *L. lactis* NZ9000 (WT) and the knockout strains ( $\Delta menA$ ,  $\Delta menB$ ,  $\Delta menE$ ,  $\Delta menG$ ), (b) *L. lactis*  $\Delta menA$  and its engineered derivatives carrying *lbmenA*, *lpmenA1*, *lpmenA2* and *lpmenA3*), (c) *L. lactis*  $\Delta menB$ , *L. lactis*  $\Delta menE$  and the engineered derivatives (carrying *lbmenB*, *lbmenE*) and (d) *L. lactis*  $\Delta menG$  and its engineered derivatives carrying *lbmenG*, *lpmenG1* and *lpmenG2*. 300 mL of GM17 medium supplemented with heme (2 $\mu$ g/mL) were used, 1 ng/mL of nisin was added as an inducer at OD<sub>600</sub> = 0.4.

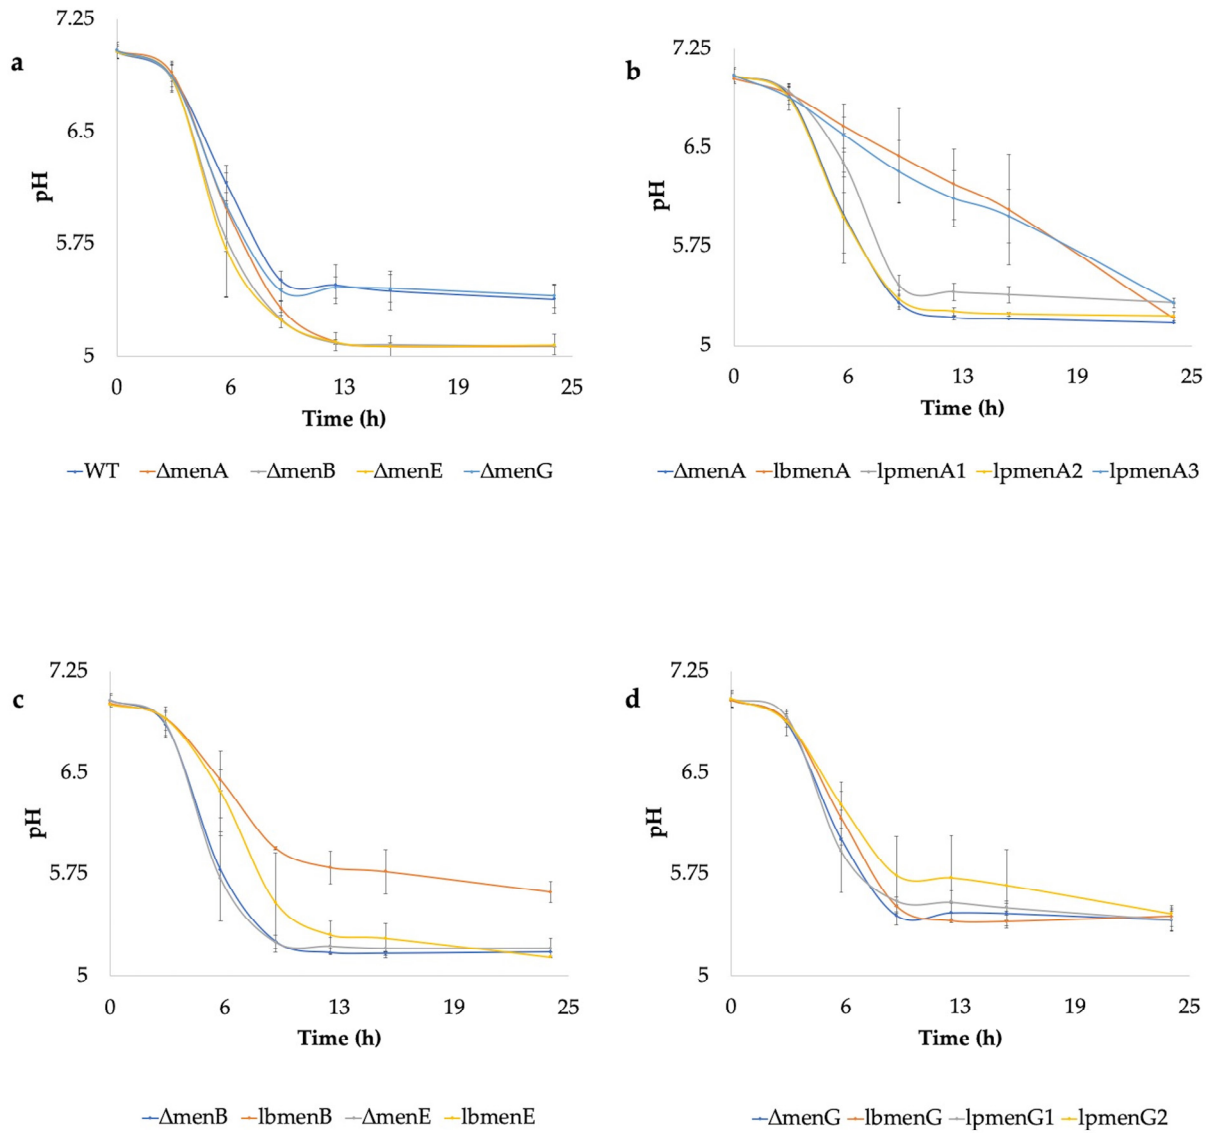

**Figure S4.** pH profile of (a) *L. lactis* NZ9000 (WT) and its menaquinone deficient strains ( $\Delta menA$ ,  $\Delta menB$ ,  $\Delta menE$ ,  $\Delta menG$ ), (b) *L. lactis*  $\Delta menA$  and its engineered strains (lbmenA, lpmenA1, lpmenA2, lpmenA3), (c) *L. lactis*  $\Delta menB$ , *L. lactis*  $\Delta menE$  and its engineered strains (lbmenB, lbmenE) and (d) *L. lactis*  $\Delta menG$  and its engineered strains (lbmenG, lpmenG1, lpmenG2). 300 mL of GM17 medium supplemented with heme (2 $\mu$ g/mL) was used, 1 ng/mL of nisin was added as inducer at OD<sub>600</sub> = 0.4.

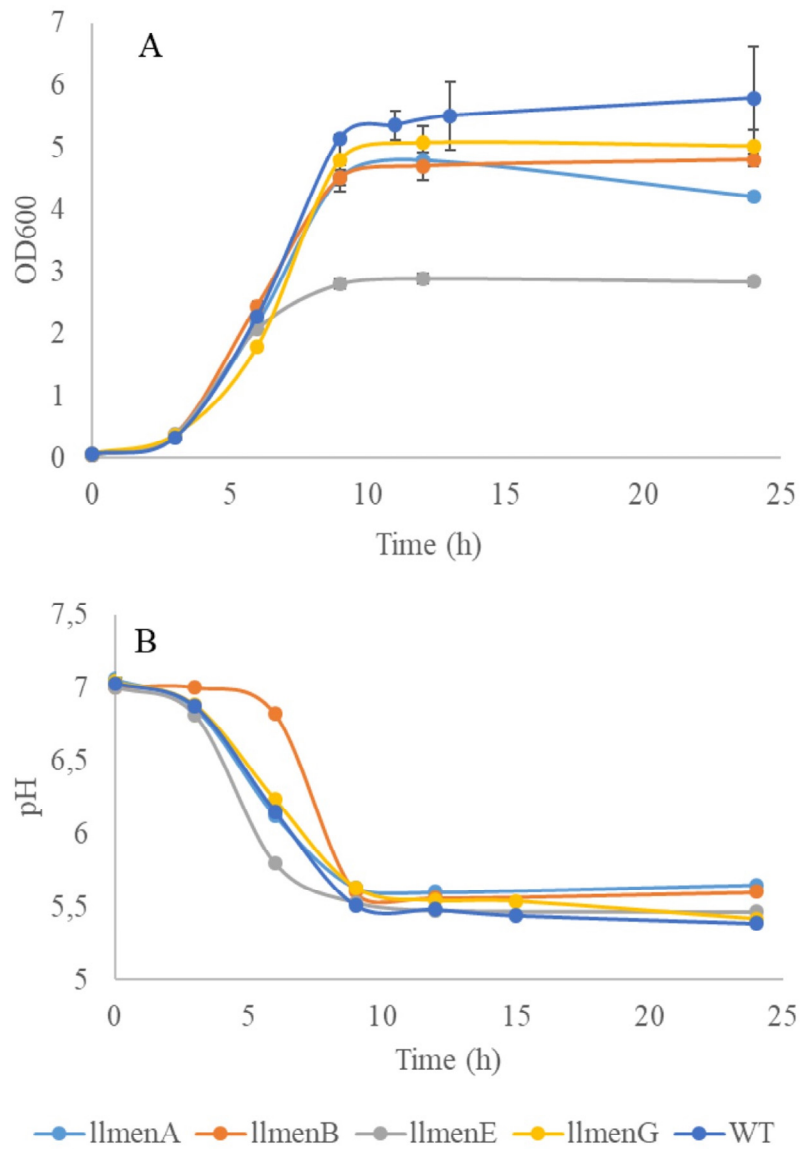

**Figure S5.** Growth profile (A) and pH analysis (B) of *L. lactis* NZ9000 (WT) and engineered deficient strains complemented by homologous genes (*llmenA*, *llmenB*, *llmenE*, *llmenG*). 300 mL of GM17 medium supplemented with heme (2 $\mu$ g/mL) were used, 1 ng/mL of nisin was added as an inducer at OD<sub>600</sub> = 0.4.
